# Supplementary material for: Leopard (Panthera pardus) status, distribution, and the research efforts across its range
Source: PubMed Central journal article supplement (PMC4861552; doi:10.7717/peerj.1974), 2016-05-04

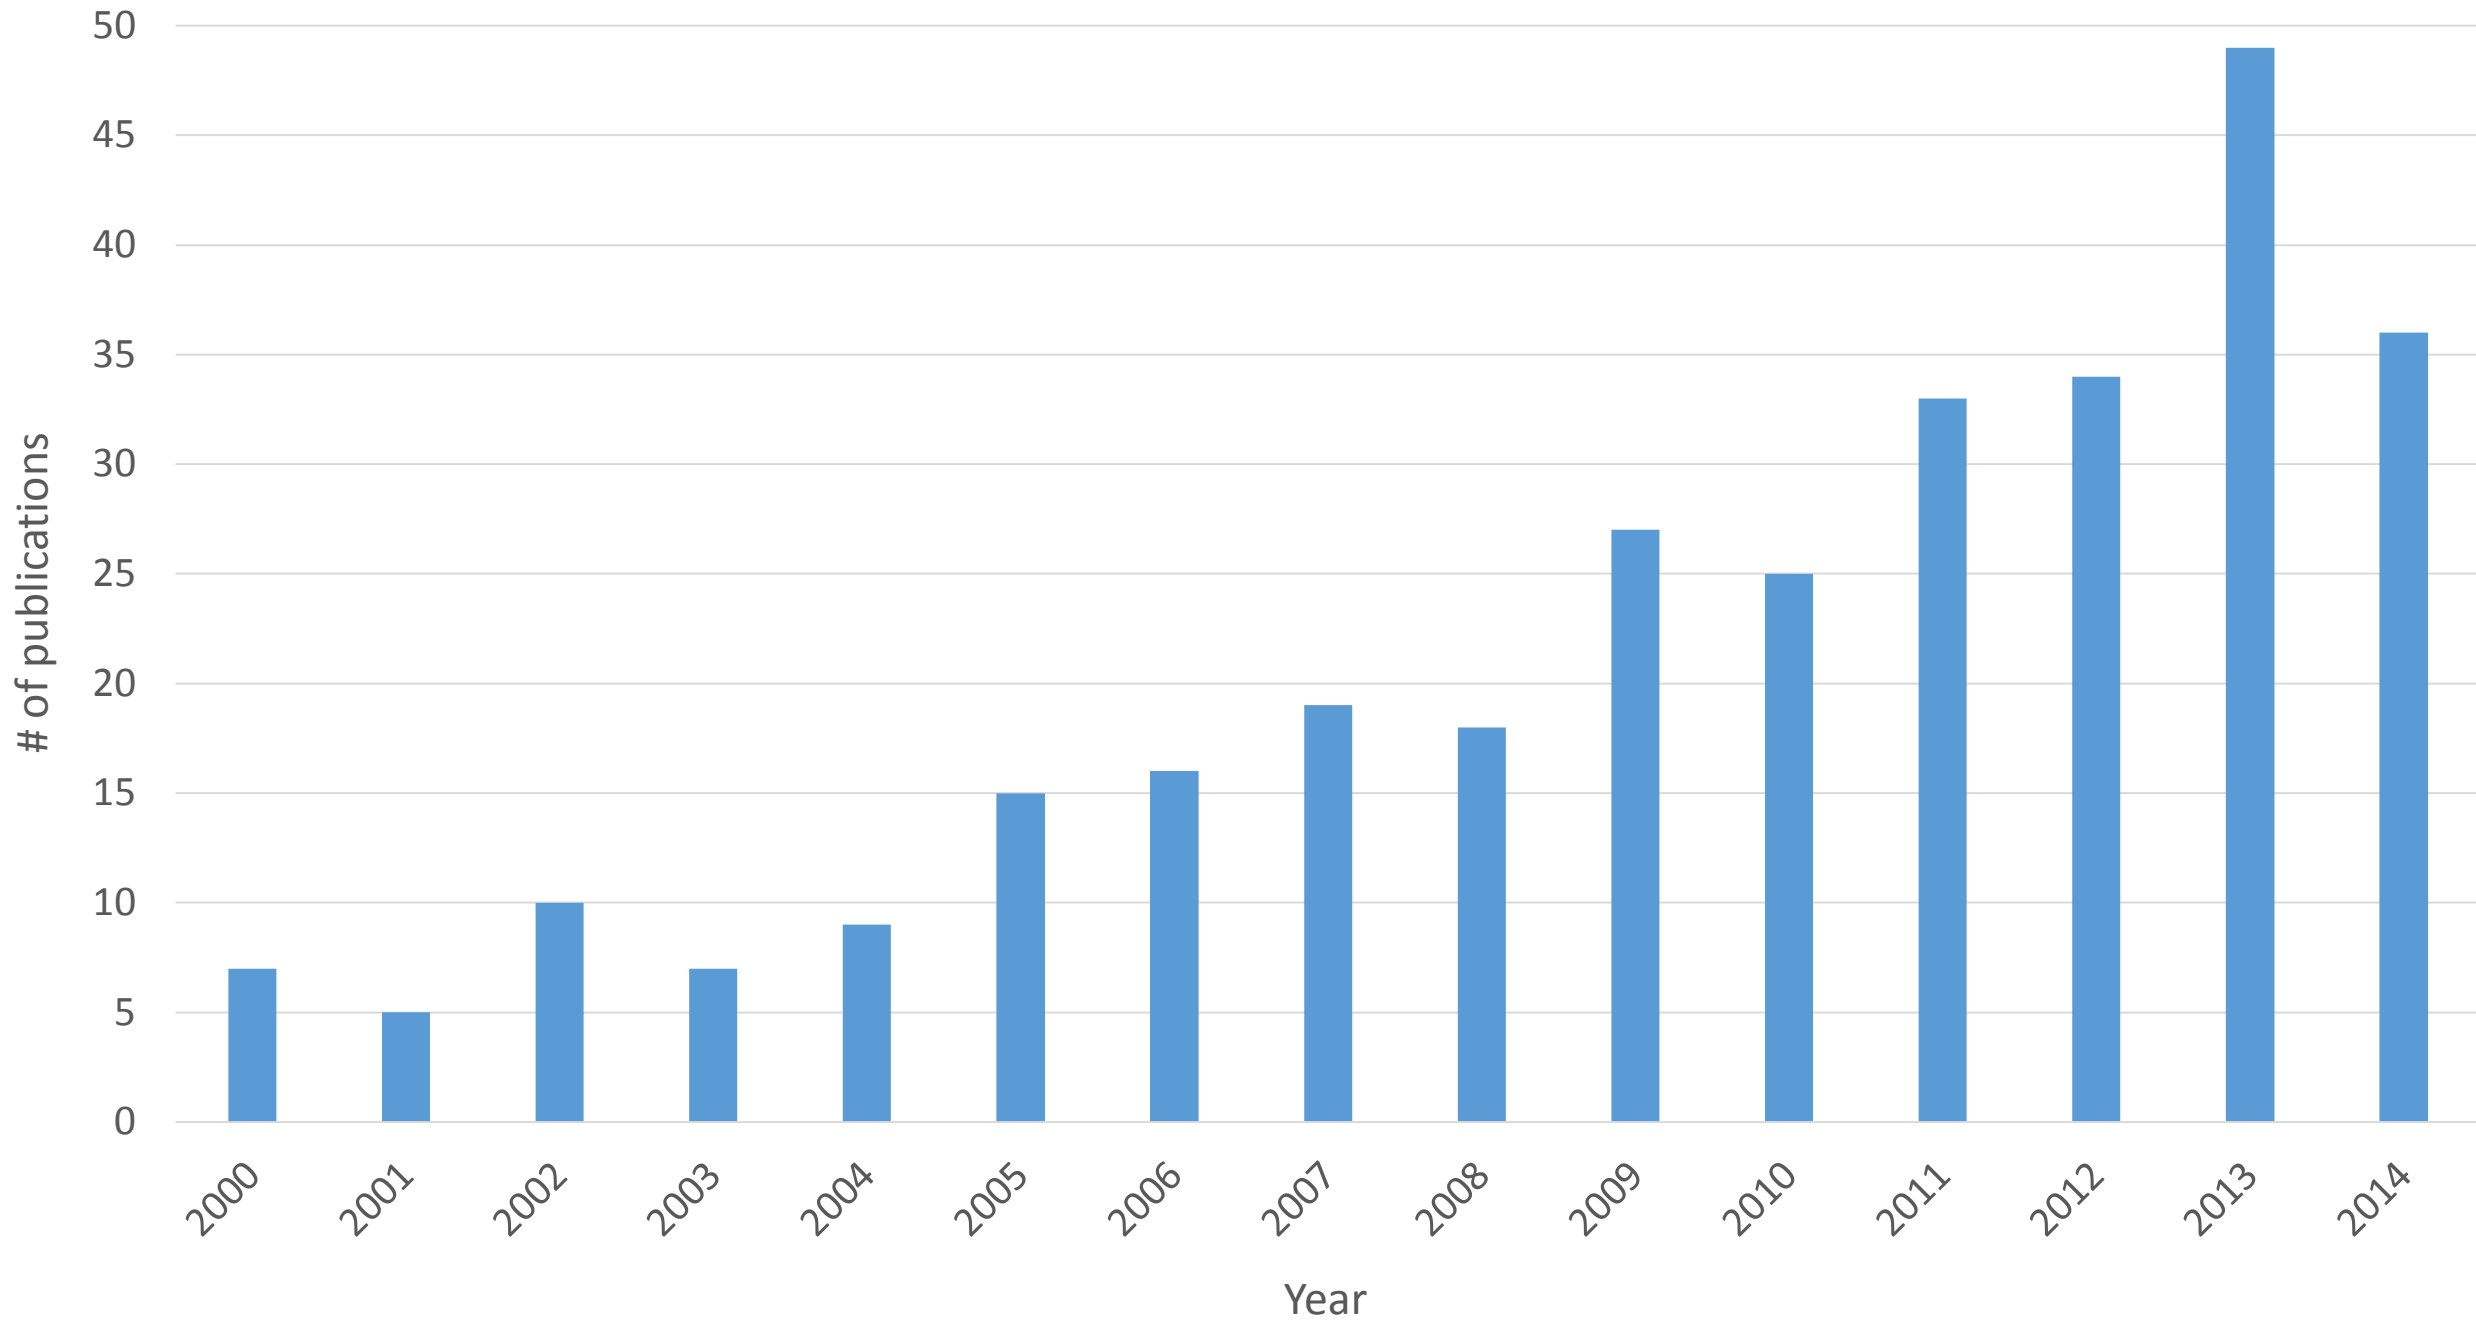

Supplement: peerj-04-1974-s005.pdf [file peerj-04-1974-s005.pdf]
