# Supplementary material for: Leopard (Panthera pardus) status, distribution, and the research efforts across its range
Source: PeerJ. 2016 May 4;4:e1974. doi: 10.7717/peerj.1974 (PMC4861552; doi:10.7717/peerj.1974)
Supplement: Supplemental Information 8 — Range statistics among different regions of leopard range. [file peerj-04-1974-s008.xlsx]

## Sheet: STable3.Regional Stats
Supplemental Table 3. Regional statistics
Note: See Supplemental Table Country Stats to see which countries were assigned to what African regions
Asia (all non-pardus)	historic extent (km2)	14917800
	extant range (km2)	1897500
	extant %	0.127197
	Max potential remaining range (km2) (1,3,4)	2558000
	Max potential remaining range % (1,3,4)	0.171473
	range loss (%)	83-87%
Africa (P. p. pardus)	historic extent (km2)	19751400
	extant range (km2)	6613000
	extant %	0.334812
	Max potential remaining range (km2) (1,3,4)	10219200
	Max potential remaining range % (1,3,4)	0.517391
	range loss (%)	48-67%
Regions of Africa
North Africa	historic extent (km2)	605300
	extant range (km2)	5800
	extant %	0.00958203
	Max potential remaining range (km2) (1,3,4)	37100
	Max potential remaining range % (1,3,4)	0.0612919
	range loss (%)	93.9-99%
West Africa	historic extent (km2)	3505000
	extant range (km2)	196000
	extant %	0.0559201
	Max potential remaining range (km2) (1,3,4)	483100
	Max potential remaining range % (1,3,4)	0.137832
	range loss (%)	86-95%
Central Africa	historic extent (km2)	6101100
	extant range (km2)	2081900
	extant %	0.341234
	Max potential remaining range (km2) (1,3,4)	3379700
	Max potential remaining range % (1,3,4)	0.553949
	range loss (%)	45-66%
East Africa	historic extent (km2)	3626300
	extant range (km2)	1457200
	extant %	0.401842
	Max potential remaining range (km2) (1,3,4)	2003300
	Max potential remaining range % (1,3,4)	0.552436
	range loss (%)	45-60%
Southern Africa	historic extent (km2)	5913800
	extant range (km2)	2872200
	extant %	0.485678
	Max potential remaining range (km2) (1,3,4)	4270800
	Max potential remaining range % (1,3,4)	0.722175
	range loss (%)	28 - 51%
