# Supplementary material for: Leopard (Panthera pardus) status, distribution, and the research efforts across its range
Source: PeerJ. 2016 May 4;4:e1974. doi: 10.7717/peerj.1974 (PMC4861552; doi:10.7717/peerj.1974)
Supplement: Supplemental Information 9 — Table of current leopard presence by country and region. [file peerj-04-1974-s009.xlsx]

## Sheet: STable4.CountryPersistence
Supplemental table 4. Status of leopard subspecies presence in historic range countries
delacouri	fusca	japonensis	kotiya	melas	nimr	orientalis	pardus	saxicolor
Extant	Extant	Extant	Extant	Extant	Extant	Extant	Extant	Extant
Cambodia	Bangladesh	China	Sri Lanka	Indonesia	Oman	China	Angola	Afghanistan
China	Bhutan				Saudi Arabia	Russian Federation	Benin	Armenia
Malaysia	China				Yemen		Botswana	Azerbaijan
Myanmar	India					Possibly extinct	Burkina Faso	Iran
Thailand	Myanmar				Possibly present	North Korea	Cameroon	Iraq
	Nepal				Israel		Central African Republic	Pakistan
Possibly Extinct	Pakistan					Extinct	Chad	Turkey
Laos					Extinct	South Korea	Congo	Turkmenistan
Vietnam					Egypt		Democratic Republic of the Congo	Russian Federation
					Jordan		Djibouti
Extinct					United Arab Emirates		Egypt	Possibly present
Singapore							Equatorial Guinea	Georgia
							Eritrea	Uzbekistan
							Ethiopia
							Gabon	Possibly extinct
							Ghana	Tajikistan
							Guinea
							Guinea-Bissau	Extinct
							Ivory Coast	Lebanon
							Kenya	Syria
							Liberia
							Malawi
							Mozambique
							Namibia
							Niger
							Nigeria
							Rwanda
							Senegal
							Sierra Leone
							Somalia
							South Africa
							South Sudan
							Sudan
							Swaziland
							Tanzania
							Uganda
							Zambia
							Zimbabwe
							Possibly present
							Algeria
							Burundi
							Mali
							Possibly extinct
							Gambia
							Lesotho
							Morocco
							Extinct
							Mauritania
							Togo
							Tunisia
