# Supplementary material for: Leopard (Panthera pardus) status, distribution, and the research efforts across its range
Source: PeerJ. 2016 May 4;4:e1974. doi: 10.7717/peerj.1974 (PMC4861552; doi:10.7717/peerj.1974)
Supplement: Supplemental Information 10 — Leopard range statistics by country and subspecies. [file peerj-04-1974-s010.xlsx]

## Sheet: STable5.Country Stats
Supplemental table 5. Subspecies by country
Note that these numbers imply higher precision than what is currently known. There is still imprecision in exact range boundaries and hence these numbers should be used only as a rough guide rather than absolute truth.
1 = extant, 3 = possibly present, 4 = possibly extinct, 5 = extinct
	Sum of area (km2)	% of country	% of subspecies (hist. range)	% of subspp (extant)	Unknown range %	Protected area km2 (cat. 1 to 4)	Protected area coverage % (cat. 1 to 4)
delacouri	2529900				0.0357722	200279	0.0791647
Cambodia	180800		0.0714653		0	36322.7	0.2009
1	13400	0.074115		0.148394		8128.36	0.606594
5	167400	0.925885				28194.3	0.168425
China	780000		0.308313		0	41838.9	0.0536396
1	4400	0.00564103		0.0487265		2764.06	0.628196
5	775600	0.994359				39074.8	0.0503801
Laos	228100		0.0901617		0	1075.4	0.00471459
1	100	0.000438404		0.00110742		6.82444	0.0682444
5	228000	0.999562				1068.57	0.00468673
Malaysia	129800		0.0513064		0.389831	7425.85	0.05721
1	18200	0.140216		0.20155		5789.8	0.318121
3	50600	0.389831				1337.59	0.0264346
5	60900	0.469183				298.461
Myanmar	373300		0.147555		0.106349	3956.28	0.0105981
1	22900	0.0613448		0.253599		213.848	0.00933836
3	39700	0.106349				442.208	0.0111387
5	310700	0.832306				3300.22	0.0106219
Singapore	500		0.000197636	0.0055371	0	33.2146	0.0664292
5	500	1				33.2146	0.0664292
Thailand	511600		0.202221		0.00039093	93593.7	0.182943
1	30000	0.0586396		0.332226		22725.4	0.757514
3	200	0.00039093				0	0
5	481400	0.94097				70868.3
Vietnam	325900		0.128819		0	17108.1	0.0524951
1	1300	0.00398895		0.0143965		866.064	0.666203
5	324600	0.996011				16242.1	0.0500372
fusca	3858300				0.0210196	201647	0.0522631
Bangladesh	124300		0.0322163		0.00563154	1585.38	0.0127545
1	5300	0.0426388		0.00496953		643.704	0.121454
3	700	0.00563154				240.044	0.342921
5	118300	0.95173				701.631	0.00593095
Bhutan	37300		0.00966747		0	14580.2	0.390891
1	37300	1		0.0349742		14580.2	0.390891
China	74900		0.0194127		0	24572.7	0.328074
1	34200	0.456609		0.0320675		22031.2	0.644187
5	40700	0.543391				2541.53	0.0624454
India	2931100		0.759687		0.0233701	104967	0.0358114
1	821000	0.2801		0.769808		69343.6	0.0844624
3	68500	0.0233701				1265.36	0.0184724
5	2041600	0.69653				34357.7	0.0168288
Myanmar	281400		0.0729337		0.0422886	29161.9	0.103631
1	24000	0.0852878		0.0225035		4726.58	0.196941
3	11900	0.0422886				676.874	0.0568802
5	245400	0.872068				23758.4	0.096815
Nepal	136300		0.0353264		0	10820.7	0.079389
1	123700	0.907557		0.115987		10674	0.086289
5	12500	0.0917095				146.771	0.0117417
Pakistan	273100		0.0707825		0	15959.1	0.0584368
1	21000	0.0768949		0.0196906		47.409	0.00225757
5	252000	0.922739				15911.7	0.0631416
japonensis	3305500				0.0166692	273368	0.0827009
China	3305500		1		0.0166692	273368	0.0827009
1	68000	0.0205718		1		11977.3	0.176136
3	55100	0.0166692				3591.74	0.0651858
5	3182500	0.962789				257799	0.0810051
kotiya	65300				0	19582.6	0.299887
Sri Lanka	65300		1		0	19582.6	0.299887
1	24400	0.37366		1		12184.8	0.499377
5	40900	0.62634				7397.83	0.180876
melas	125200				0	4207.33	0.0336049
Indonesia	125200		1		0	4207.33	0.0336049
1	20600	0.164537		1		3387.98	0.164465
5	104600	0.835463				819.347	0.00783315
nimr	911400				0.00504718	18088.3	0.0198468
Egypt	52700		0.0578231		0	2842.95	0.0539459
5	52700	1				2842.95	0.0539459
Israel	27700		0.0303928		1	2795.38	0.100916
3	900	0.032491				284.472	0.31608
4	300	0.0108303				2.71072
5	26400	0.953069				2508.2	0.0950076
Jordan	36300		0.0398288		0	536.065	0.0147676
5	36300	1				536.065	0.0147676
Oman	79000		0.0866798		0	4431.46	0.0560945
1	6900	0.0873418		0.398844		1509.54	0.218773
5	72000	0.911392				2921.93	0.0405823
Saudi Arabia	411800		0.451832		0.00825644	7482.48	0.0181702
1	4800	0.0116561		0.277457		9.32937	0.00194362
3	3400	0.00825644					0
5	403600	0.980087				7473.49	0.0185171
United Arab Emirates	4900		0.00537634		0		0
5	4900	1					0
Yemen	299200		0.328286		0		0
1	5600	0.0187166		0.323699			0
5	293500	0.980949					0
orientalis	432800				0.00924214	19600	0.0452865
China	172800		0.399261		0.0231481	8500	0.0491898
1	3100	0.0179398		0.378049			0
3	4000	0.0231481					0
5	165800	0.959491				8500	0.0512666
North Korea	121700		0.281192		0		0
5	121700	1					0
Russian Federation	45700		0.105591		0	5400	0.118162
1	5100	0.111597		0.621951		1800	0.352941
5	40700	0.890591				3600	0.0884521
South Korea	92600		0.213956		0	5400	0.0583153
5	92600	1				5400	0.0583153
pardus	19751400				0.182585	1.3995e+06	0.0708556
Algeria	178800		0.00905252		1	1150.12	0.00643241	North Africa
3	3600	0.0201342					0
4	24700	0.138143					0
5	150500	0.841723				1150.12	0.00764196
Angola	1243200		0.0629424		0.331725	82141.6	0.0660727	Southern Africa
1	678600	0.545849		0.102615		60722.6	0.0894822
3	18300	0.0147201					0
4	394100	0.317005				21414.3	0.0543373
5	152100	0.122346				4.60021	3.02446e-05
Benin	116000		0.005873		0.037931	8610.53	0.0742287	West Africa
1	16300	0.140517		0.0024648		5046.78	0.309618
4	4400	0.037931					0
5	95400	0.822414				3563.75	0.0373558
Botswana	579000		0.0293144		0.327461	109368	0.188891	Southern Africa
1	367200	0.634197		0.0555262		107761	0.293466
4	189600	0.327461				1106.36	0.00583524
5	22300	0.0385147				501.098	0.0224708
Burkina Faso	272800		0.0138117		0.0216276	30149.2	0.110518	West Africa
1	19000	0.0696481		0.00287309		8549.71	0.449985
4	5900	0.0216276				0	0
5	247800	0.908358				21599.5	0.0871652
Burundi	25000		0.00126573		0.112	975.93	0.0390372	East Africa
1	0	0		0			0
3	900	0.036				493.679	0.548532
4	1900	0.076				371.609	0.195584
5	22200					110.642
Ivory Coast	320600		0.0162318		0.270742	20359.6	0.0635047	West Africa
1	39200	0.122271		0.00592763		16277.3	0.415238
4	86800	0.270742				2037.81	0.0234771
5	194600	0.606987				2044.48	0.0105061
Cameroon	462000		0.0233907		0.11342	39587.7	0.0856877	Central Africa
1	132700	0.287229		0.0200662		29121.9	0.219457
3	51600	0.111688				1851.68	0.0358853
4	800	0.0017316				145.212	0.181515
5	276900	0.599351				8468.89	0.0305846
Central African Republic	618100		0.031294		0.285714	73373.8	0.118709	Central Africa
1	369200	0.597314		0.0558286		70870.9	0.191958
3	6300	0.0101925					0
4	170300	0.275522				2502.88	0.0146969
5	72300						0
Chad	423300		0.0214314		0.0885897	33622.6	0.0794296	Central Africa
1	68700	0.162296		0.0103885		27021.2	0.393322
3	2500	0.00590598					0
4	35000	0.0826837				1285.95	0.0367414
5	317000	0.748878				5315.39	0.0167678
Congo	344800		0.017457		0.00087007	36675.9	0.106369	Central Africa
1	310000	0.899072		0.0468767		36366.4	0.117311
4	300	0.00087007					0
5	34600	0.100348				308.537	0.00891727
Democratic Republic of the Congo	2309400		0.116923		0.256344	112365	0.0486555	Central Africa
1	657600	0.284749		0.099439		102879	0.156447
3	39000	0.0168875					0
4	553000	0.239456				3499.76	0.00632868
5	1059800	0.458907				5985.82	0.00564806
Djibouti	21700		0.00109866		0.0138249		0	East Africa
1	1600	0.0737327		0.000241944			0
4	300	0.0138249					0
5	19800	0.912442
Egypt	79800		0.00404022		0	4838.36	0.0606311	North Africa
1	5800	0.0726817		0.000877047			0
5	74000	0.927318				4838.36	0.0653833
Equatorial Guinea	24600		0.00124548		0	3694.62	0.150188	Central Africa
1	12800	0.520325		0.00193555		2812.02	0.219689
5	11700	0.47561				882.606	0.0754364
Eritrea	121100		0.00613121		0	5903	0.0487448	East Africa
1	22600	0.186623		0.00341746		1743.37	0.0771402
5	98400	0.812552				4159.63	0.0422726
Ethiopia	1124200		0.0569175		0.257961	45639.1	0.0405969	East Africa
1	346900	0.308575		0.0524565		35444.1	0.102174
4	290000	0.257961				1436.61	0.00495382
5	487300	0.433464				8758.39	0.0179733
Gabon	259400		0.0131332		0	33217.7	0.128056	Central Africa
1	250000	0.963763		0.0378038		33217.7	0.132871
5	9300	0.035852					0
Gambia	10400		0.000526545		1	174.235	0.0167533	West Africa
4	800	0.0769231				20.8597	0.0260746
5	9600	0.923077				153.375	0.0159766
Ghana	238300		0.012065		0.113722	10938.8	0.0459035	West Africa
1	14700	0.0616869		0.00222286		4114.88	0.279924
4	27100	0.113722				5225.33	0.192817
5	196500	0.824591				1598.59	0.00813531
Guinea	243900		0.0123485		0.157852	1036.83	0.00425103	West Africa
1	28700	0.117671		0.00433987		891.24	0.0310537
3	2500	0.0102501					0
4	36000	0.147601				138.764	0.00385455
5	176900	0.725297				6.8229	3.85692e-05
Guinea-Bissau	31100		0.00157457		0.411576		0	West Africa
1	7000	0.22508		0.00105851			0
4	12800	0.411576					0
5	11300	0.363344					0
Kenya	574200		0.0290714		0.265935	42105.4	0.0733287	East Africa
1	312900	0.544932		0.0473152		39401.4	0.125923
4	152700	0.265935				1644.73	0.010771
5	108700	0.189307				1059.23	0.00974451
Lesotho	30100		0.00152394		0	69.5143	0.00230945	Southern Africa
1	100	0.00332226		1.51215e-05		1.10896	0.0110896
5	30000	0.996678				68.4054	0.00228018
Liberia	95100		0.00481485		0.293375	1686.58	0.0177348	West Africa
1	23000	0.241851		0.00347795		983.774	0.0427728
4	27900	0.293375				702.803	0.0251901
5	44100	0.463722					0
Malawi	98300		0.00497686		0.136317	10029	0.102025	Southern Africa
1	11100	0.11292		0.00167849		7732.83	0.696652
4	13400	0.136317				519.51	0.0387694
5	73800	0.750763				1776.69	0.0240743
Mali	535500		0.027112		0.0817927	39487.2	0.0737389	West Africa
1	6000	0.0112045		0.00090729			0
4	43800	0.0817927				2721.59	0.0621367
5	485700	0.907003				36765.6	0.0756961
Mauritania	121300		0.00614134		0		0	West Africa
5	121300	1					0
Morocco	293800				0.010211	4423.32	0.0150556	North Africa
4	3000	0.010211	0.000151888
5	290700	0.989449				4423.32	0.0152161
Mozambique	778700				0.191858	68963.3	0.0885621	Southern Africa
1	457000	0.586876	0.0231376	0.0691053		66738.4	0.146036
3	8700	0.0111725					0
4	140700	0.180686				1445.95	0.0102768
5	172200	0.221138				778.936	0.00452344
Namibia	809300		0.0409743		0	125019	0.154478	Southern Africa
1	568900	0.702953		0.0860262		106866	0.187846
5	240500	0.29717				18153	0.0754801
Niger	293400		0.0148546		0	25074.1	0.0854603	West Africa
1	500	0.00170416		7.56075e-05		497.372	0.994744
5	292800	0.997955				24576.7	0.0839368
Nigeria	902800		0.0457082		0.00808595	29544.8	0.0327257	West Africa
1	11500	0.0127381		0.00173897		7860.42	0.683515
4	7300	0.00808595				4154.95	0.569172
5	884000	0.979176				17529.4	0.0198297
Rwanda	25300		0.00128092		0.106719	2235.1	0.0883439	East Africa
1	2200	0.0869565		0.000332673		910.781	0.413992
4	2700	0.106719				1117.27	0.413805
5	20400	0.806324				207.045	0.0101493
Senegal	196000		0.00992335		0.136224	20735.3	0.105792	West Africa
1	29400	0.15		0.00444572		7415.3	0.252221
4	26700	0.136224				860.709	0.0322363
5	140000	0.714286				12459.3	0.0889946
Sierra Leone	70800		0.00358456		0.0706215	2907.38	0.0410647	West Africa
1	500	0.00706215		7.56075e-05		314.877	0.629755
3	2500	0.0353107				41.0343	0.0164137
4	2500	0.0353107				301.558	0.120623
5	65300	0.922316				2249.91	0.034455
Somalia	637600		0.0322813		0.00878294		0	East Africa
1	33700	0.0528545		0.00509595			0
3	5600	0.00878294					0
5	598200	0.938206
South Africa	1219100		0.0617222		0.00426544	38233.3	0.0313619	Southern Africa
1	401300	0.329177		0.0606826		33893.7	0.0844598
4	5200	0.00426544					0
5	812700	0.666639				4339.62	0.00533976
South Sudan	626900		0.0317395		0.576487	51415.2	0.0820149	Central Africa
1	249800	0.398469		0.0377735		46848.2	0.187543
4	361400	0.576487				4566.94	0.0126368
5	15600	0.0248844					0
Spain	0		0		0		0	North Africa
5	0	#DIV/0!					0
Sudan	1032700		0.0522849		0.0752397	8399.73	0.00813376	Central Africa
1	31000	0.0300184		0.00468767		7968.63	0.257053
3	11200	0.0108454					0
4	66500	0.0643943				2	3.00752e-05
5	924100	0.894839				429	0.000464235
Swaziland	17100		0.000865761		0	695.201	0.0406551	Southern Africa
1	10100	0.590643		0.00152727		453.744	0.0449251
5	7000	0.409357				241.458	0.034494
Tanzania	887000		0.0449082		0.0422773	163103	0.183881	East Africa
1	672100	0.757723		0.101632		160595	0.238944
3	0	0					0
4	37500	0.0422773				229.579	0.00612211
5	177400	0.2				2278.4
Togo	56800		0.00287575		0	4165.97	0.0733446	West Africa
1	300	0.00528169		4.53645e-05			0
5	56500	0.994718				4165.97	0.0737341
Tunisia	52900		0.00267829			224.547	0.00424474	North Africa
5	52900	1				224.547	0.00424474
Uganda	210100		0.0106372		0.475012	19685.1	0.0936942	East Africa
1	65100	0.309852		0.0098441		17741.7	0.272531
4	99800	0.475012				1139.41	0.0114169
5	45300	0.215612				803.993	0.0177482
Zambia	749900		0.0379669		0.621416	60444.7	0.0806037	Southern Africa
1	218000	0.290705		0.0329649		52638.4	0.24146
3	18100	0.0241366				5829.26	0.322059
4	447900	0.59728				1977.1	0.00441416
5	65900	0.0878784					0
Zimbabwe	389100		0.0196999		0.418144	27029.8	0.0694674	Southern Africa
1	160000	0.411205		0.0241944		26796.4	0.167478
4	162700	0.418144				233.349	0.00143423
5	66400	0.17065					0
saxicolor	3689200				0.115201	286885	0.0777636
Afghanistan	502900		0.136317		0.390336	1517.01	0.00301652
1	5700	0.0113343		0.00946687		824.522	0.144653
3	186700	0.371247				410.311	0.0021977
4	9600	0.0190893					0
5	300800	0.598131				282.176	0.000938084
Armenia	29600		0.00802342		0	3652.83	0.123406
1	3300	0.111486		0.00548082		768.571	0.2329
5	26300	0.888514				2884.25	0.109667
Azerbaijan	75000		0.0203296		0.00666667	7388.14	0.0985085
1	5600	0.0746667		0.00930078		2073.62	0.370288
3	500	0.00666667				153.395	0.306791
5	68900					5161.13	0.0749075
Georgia	69300		0.0187846		0.02886	5461.88	0.078815
1	1000	0.01443		0.00166085		424.729	0.424729
3	2000	0.02886				1492.76	0.746381
5	66400	0.958153				3544.39	0.0533793
Iran	1520600		0.412176		0.0702354	235907	0.155141	*Note: Using Iranian protected area shapefile instead of the WDPA results in a higher % of protected extant leopard range
1	525700	0.345719		0.873111		99641.9	0.189541
3	106800	0.0702354				14917.6	0.139678
5	888100	0.584046				121347	0.136637
Iraq	228400		0.0619104		0.899737	2545.37	0.0111444
1	23000	0.100701		0.0381996		1148.97	0.0499552
5	205500	0.899737				1396.4	0.00679516
Lebanon	9800		0.0026564		0	0	0
5	9800	1					0
Pakistan	500700		0.13572		0.216697	16561.6	0.033077
1	2900	0.00579189		0.00481648			0
3	25200	0.0503295				19.8208	0.000786541
4	83300	0.166367				5193.13	0.0623425
5	389200	0.777312				11348.7	0.029159
Russian Federation	96200		0.0260761		1	8658.79	0.0900082
1	6800	0.0706861		0.0112938		1536.39	0.22594
3	1000	0.010395					0
5	88500	0.919958				7122.4	0.0804791
Syria	130900		0.0354819		0		0
5	130900	1					0
Tajikistan	29300		0.0079421		0	1896.25	0.0647183
3	900	0.0307167					0
5	28500	0.972696				1896.25	0.066535
Turkey	449700		0.121896		0		0
1	9000	0.0200133		0.0149477			0
5	440800	0.980209					0
Turkmenistan	43400		0.0117641		0.152074	2998.38	0.0690872
1	19100	0.440092		0.0317223		2140.96	0.112092
3	6600	0.152074				857.421	0.129912
5	17700	0.407834				0	0
Uzbekistan	3300		0.000894503		0.727273	298.418	0.0904298
3	2400	0.727273				298.418	0.124341
5	900	0.272727				0	0
Grand Total	34859500
