# Supplementary material for: Leopard (Panthera pardus) status, distribution, and the research efforts across its range
Source: PeerJ. 2016 May 4;4:e1974. doi: 10.7717/peerj.1974 (PMC4861552; doi:10.7717/peerj.1974)
Supplement: Supplemental Information 12 — Published leopard population density estimates by country and subspecies since 2000. [file peerj-04-1974-s012.xlsx]

## Sheet: Stable7.Popn Density
Supplemental table 7. Published leopard population density estimates for data collected after 2000
Subspecies	Resident range	Population density estimate?	Density estimate (leopards/100 km2)	Region (s)	Source (s)	Notes
delacouri
Cambodia	14800	Yes	3.6	Mondolkiri Protected Forest	Gray and Prum 2012	They used camera traps across this small area; the core area of Mondulkiri is ~1500 km
China	8700	No
Laos	2800	No
Malaysia	65600	Yes	4; 3	Ayer Hitam Forest Reserve; Kenyir wildlife corridor	Sanei et al. 2011; Hedges et al. 2015
Myanmar	34200	No
Singapore	0	NA
Thailand	35700	Yes	4.78	Kaeng Krachan NP	Raza et al. 2012
Vietnam	2800	No
Grand Total		3 countries			4 studies
fusca
Bangladesh	6000	No
Bhutan	30500	Yes	1.04	Jigme Singye Wangchuck NP	Wang and Macdonald 2009
China	16500	No
India	825400	Yes	3.4 (Borah et al. 2014); 1.68 (Goswami and Ganesh 2014); 23.5 (Chauhan et al. 2005); 14.99 (Harihar et al. 2009); 4.8 (Athreya et al. 2013); 14.9 (Kalle et al. 2011); 1.1 - 2.99 (Selvan et al. 2014)	Manas NP (Borah et al. 2014); Manas core area (Goswami and Ganesh 2014); Sariska tiger reserve (Chauhan et al. 2005); Chilla range of Rajaji National Park (Harihar et al. 2009); Maharastra (Athreya et al. 2013); Mudumalai tiger reserve (Kalle et al. 2011); Pakke tiger reserve (Selvan et al. 2014)	Borah et al. 2014; Goswami and Ganesh 2014; Chauhan et al. 2005; Harihar et al. 2009; Athreya et al. 2013; Kalle et al. 2011; Selvan et al. 2014;
Myanmar	30900	No
Nepal	107900	Yes	5.61; 5	Parsa wildlife reserve; Bardia National Park	Thapa et al. 2014 ; Wegge et al. 2009
Pakistan	12300	No
Grand Total		3 countries			10 studies
japonensis
China	75200	No
Grand Total
	0
	0
kotiya
Sri Lanka	24400	No
Grand Total
melas
Indonesia	21200	No
Grand Total
nimr
Egypt	0	NA
Israel	0	Yes	8 individuals	Judean and Negev highlands	Perez et al. 2006
Jordan	0	NA
Lebanon	0	NA
Oman	7100	Yes	17 individuals (calculated density at 0.4)	Jabal Samhan NP	Spalton et al. 2006
Palestinian Territory	0	NA
Saudi Arabia	4800	No
Syria	0	NA
United Arab Emirates	0	NA
Yemen	5500	No
Grand Total		2 countries			2 studies
orientalis
China	3100	Yes	0.62	Laoye Mountains of Jilin province	Qi et al. 2015
North Korea	0	NA
Russia	5200	Yes	29 individuals; 26 individuals	population-wide	Hebblewhite et al. 2011; Sugimoto et al. 2014	Note there have been many reports with total counts rather than density estimates, e.g., Aramilev et al. 1998, 2000 and Pikunov et al. 1997, 2000, 2003, 2009,
South Korea	0	NA
Grand Total		2			3 studies
saxicolor
Afghanistan	5400	No
Armenia	5600	Yes	0.34	Nuvadi area	Khorozyan et al. 2008
Azerbaijan	5800	No
Georgia	0	NA
Iran	338000	Yes	1.87; 2.6	Bamu National Park, Golestan National Park	Ghoddousi et al. 2010; Hamidi et al. 2014
Iraq	24300	No
Lebanon	0	NA
Pakistan	2000	No
Russian Federation	0	NA
Syria	0	NA
Tajikistan	0	NA
Turkey	4200	No
Turkmenistan	19300	No
Uzbekistan	0	NA
Grand Total		2 countries			3 studies
pardus
Algeria	0	NA
Angola	686100	No
Benin	16000	No
Botswana	366600	Yes	7.5 (Shashe Limpopo group 2010); 0.1 (Boast and Houser 2012); 0.48 (Kent 2011)	Northern Tuli Game Reserve; Ghanzi commercial farmlands; Ghanzi region	Shashe Limpopo 2010, Boast and Houser 2012, Kent 2011
Burkina Faso	13200	No
Burundi	3400	No
Cote d'Ivoire	39000	No
Cameroon	132600	Yes	1.28, 1.46	Bénoué Complex (Bénoué NP, Boubandjida NP and Faro NP) and Hunting Zones (28-Sport zones adjacent to parks)	Croes et al. 2011
Central African Republic	371000	No
Chad	68300	No
Congo	307100	No
DRC	644100	No
Djibouti	1500	No
Egypt	5700	No
Equatorial Guinea	12900	No
Eritrea	22700	No
Ethiopia	343000	No
Gabon	252200	Yes	2.7 - 12.1	Lope and Ivindo NPs	Henschel 2008
Gambia	0	No
Ghana	12300	No
Guinea	16200	no
Guinea-Bissau	5400	No
Kenya	259200	Yes	8.4-12	Mpala ranch	O'Brien and Kinnaird 2011
Lesotho	300	No
Liberia	23200	No
Malawi	10700	No
Mali	11300	No
Mauritania	0	NA
Morocco	0	NA
Mozambique	455500	No
Namibia	568600	Yes	3.6 farmland and 1.0 Park; 1.18 and 2.4	Waterberg plateau farmland and Waterberg Plateau Park; Bwabwata National Park	Stein et al. 2011; Funston et al. 2014	Hanssen and Stander 2004 give a range of estimates for the country; they range from 0.5 - 3.8 leopards/100
Niger	400	No
Nigeria	11800	No
Rwanda	4300	No
Senegal	29500	Yes	2 to 4	Niokolo Koba NP	Kane et al. 2015
Sierra Leone	500	No
Somalia	33300	No
South Africa	401300	Yes	10.7 (Chase Grey et al. 2013); 0.75 (Martins 2008); 2.49 to 11.11 (Balme et al. 2010); 7.17 - 11.21 (Balme et al. 2009); 2.5 - 7 (Chapman and Balme 2010); 12.7 (Maputla et al. 2013); 18.8 (Owen et al. 2010)	Soutpansberg mountains (Chase Grey et al. 2013); Cederberg mountains (Martins 2008); various (Balme et al. 2010); Phinda Private Game Reserve (Balme et al. 2009); Zululand Rhino Reserve (Chapman and Balme 2010); northern Kwazulu-Natal (Maputla et al. 2013); Karongwe private game reserve (Owen et al. 2010)	Chase Grey et al. 2013; Martins 2008, Balme et al. 2010; Balme et al. 2009; Chapman and Balme 2010; Maputla et al. 2013; Owen et al. 2010
South Sudan	245000	No
Sudan	37500	No
Swaziland	10200	No
Tanzania	668800	Yes	7.9	small part of Tarangire NP	Msuha 2009
Togo	400	No
Tunisia	0	NA
Uganda	62700	No
Zambia	233300	Yes	3.36 (NP only); 4.79	Luambe NP and GMA-Chanjuzi	Ray 2011
Zimbabwe	121400	Yes	7.64; 5.12; 8.3; 6 and 2.8	Save Valley, Mangwe district, Gonarezhou NP	Williams 2011, Grant 2012, Groom 2011, du Preez et al. 2014
Grand Total		11 countries			22 studies
